# Supplementary material for: Proof of concept of fully automated adaptive workflow for head and neck radiotherapy treatments with a conventional linear accelerator
Source: PubMed Central journal article supplement (PMC11799547; doi:10.3389/fonc.2025.1382537), 2025-01-23

# Supplementary Material

## 1 SUPPLEMENTARY TABLES AND FIGURES

### 1.1 Figures

**Figure S1.** Diagram of the Phase 1 Intelliplan Optimization process in the mCycle environment.

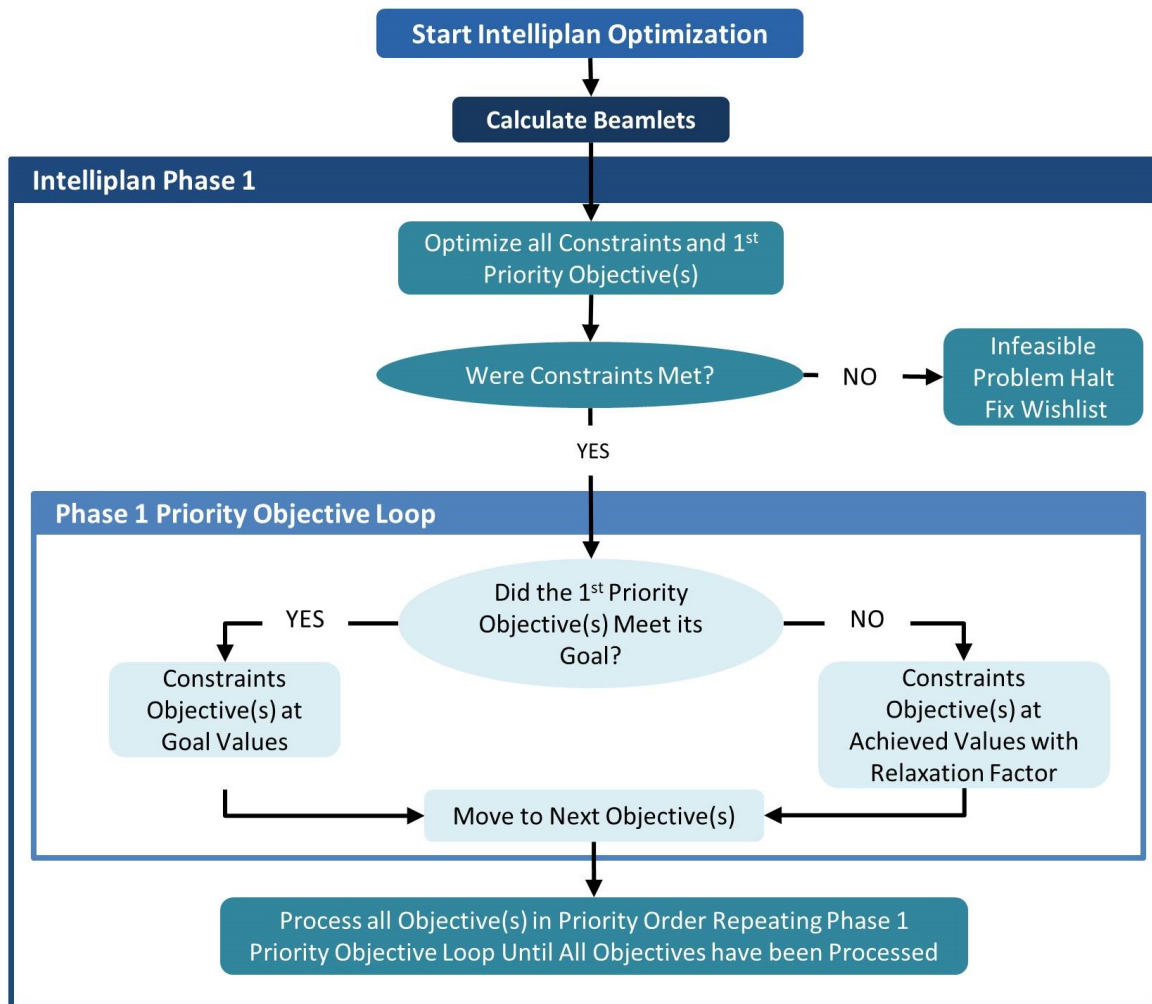

**Figure S2.** Diagram of the Phase 2 Intelliplan Optimization process in the mCycle environment.

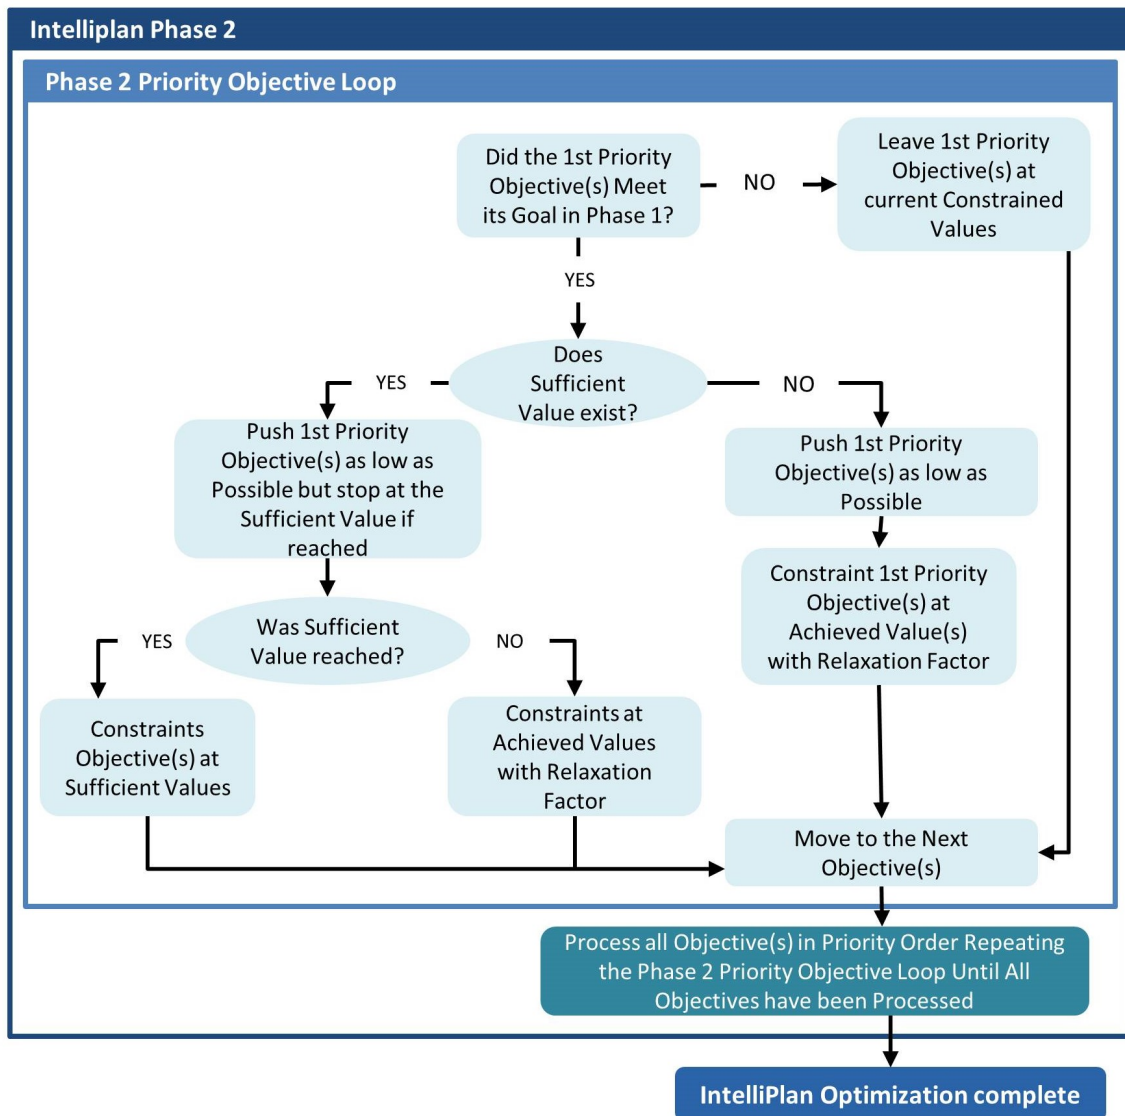

Supplement: Image1.pdf [file Image1.pdf]
